# Supplementary material for: Gene therapy conversion of striatal astrocytes into GABAergic neurons in mouse models of Huntington’s disease
Source: PubMed Central journal article supplement (PMC7046613; doi:10.1038/s41467-020-14855-3), 2020-02-27
Supplement: 41467_2020_14855_MOESM1_ESM.pdf [file 41467_2020_14855_MOESM1_ESM.pdf]

## **Supplementary information**

Gene therapy conversion of striatal astrocytes into GABAergic neurons in mouse models of Huntington's disease

Wu et al.

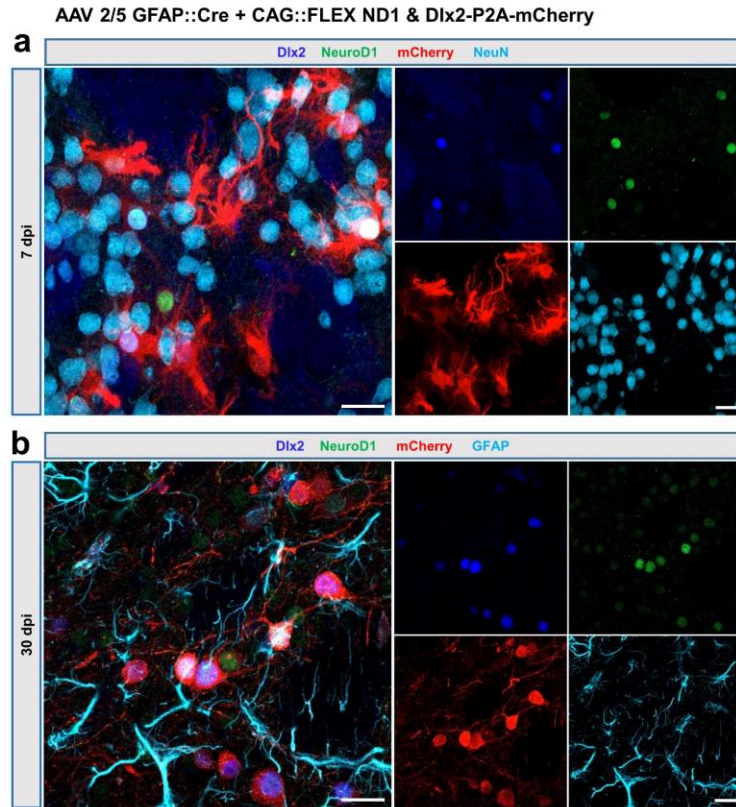

**Supplementary Figure 1. Ectopic expression of NeuroD1 and Dlx2 in AAV-infected cells.**

(a) Co-staining of Dlx2 (dark blue), NeuroD1 (green), mCherry (red), and NeuN (cyan) at 7 days post AAV2/5 injection (7 dpi). No NeuroD1 or Dlx2 were detected in NeuN positive cells at 7 dpi. (b) Co-staining of Dlx2 (dark blue), NeuroD1 (green), mCherry (red), and GFAP (cyan) at 30 days post AAV2/5 injection (30 dpi). NeuroD1 and Dlx2 were colocalized with mCherry, but not with GFAP. Scale bar: 20  $\mu$ m. Quantification was shown in **Figure 2c**.

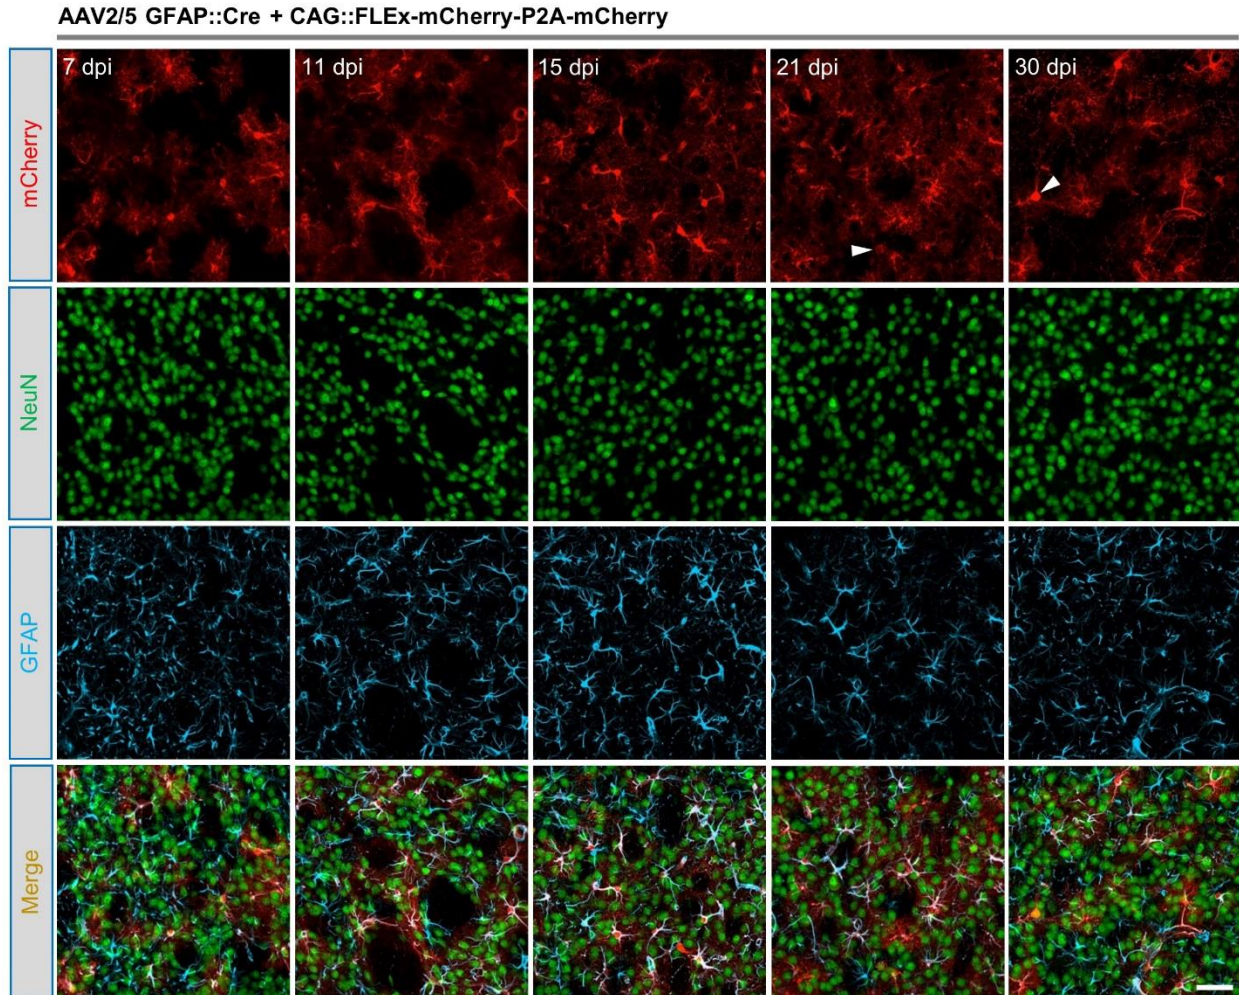

**Supplementary Figure 2. Time course of mCherry control virus infection in the striatum of WT mice.**

WT mice were injected with AAV2/5 GFAP::Cre + AAV2/5 CAG::mCherry-P2A-mCherry, and sacrificed at different time points (7, 11, 15, 21, and 30 dpi) for immunohistochemistry analyses. Most of the mCherry<sup>+</sup> cells co-stained with GFAP but not NeuN, with only a few exception at 21 and 30 dpi (arrowhead). Scale bar: 50  $\mu$ m. Quantification was shown in **Figure 2f**.

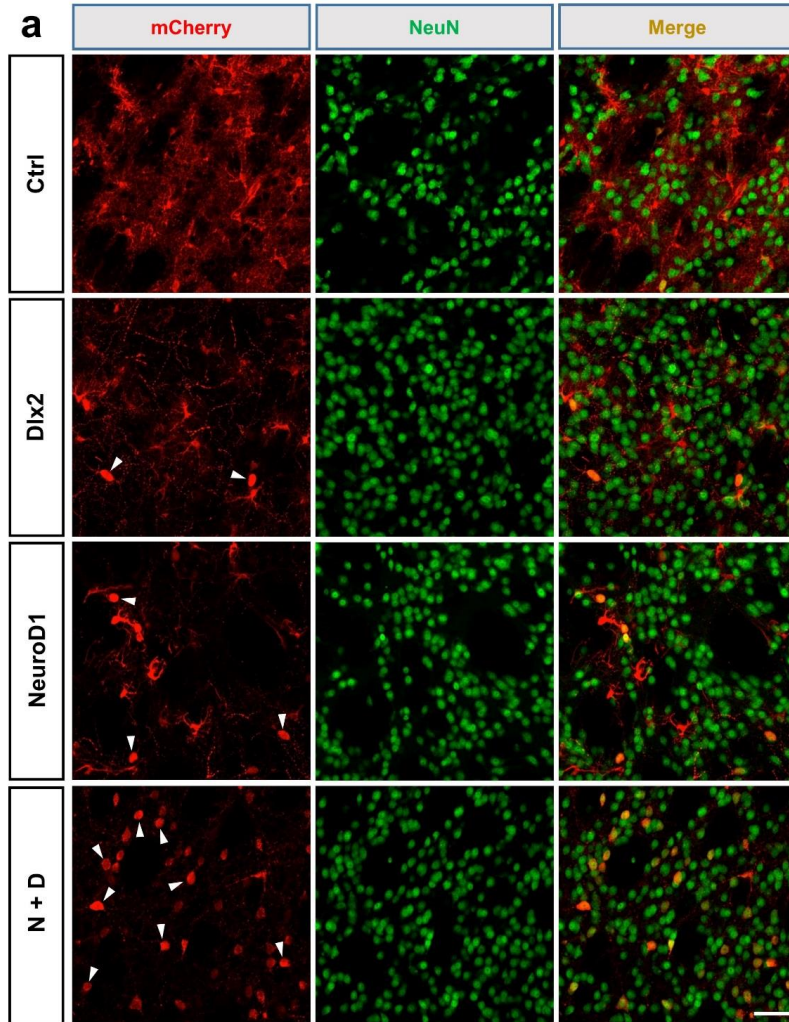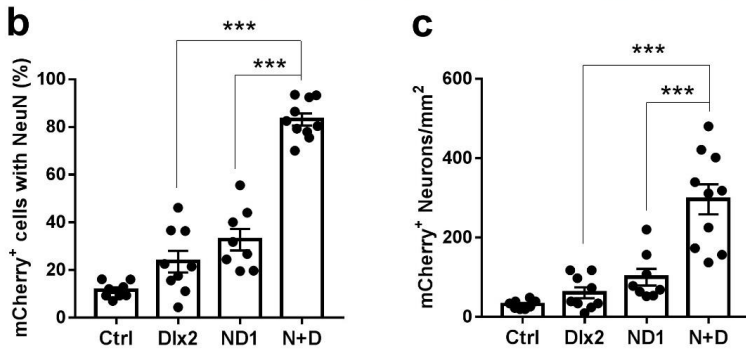

**Supplementary Figure 3. Synergistic effect of NeuroD1 and Dlx2 in increasing the conversion efficiency in the striatum.**

(a) WT mice were injected with different AAV2/5 and sacrificed at 30 dpi for immunostaining analysis to compare the conversion efficiency among different groups. Scale bar: 50  $\mu$ m. (b, c) Quantified data showing that the NeuroD1 plus Dlx2 group has the highest conversion efficiency (b) and generates the greatest number of neurons (c). Data are shown as mean  $\pm$  SEM.

### Converted neurons in WT mouse brain

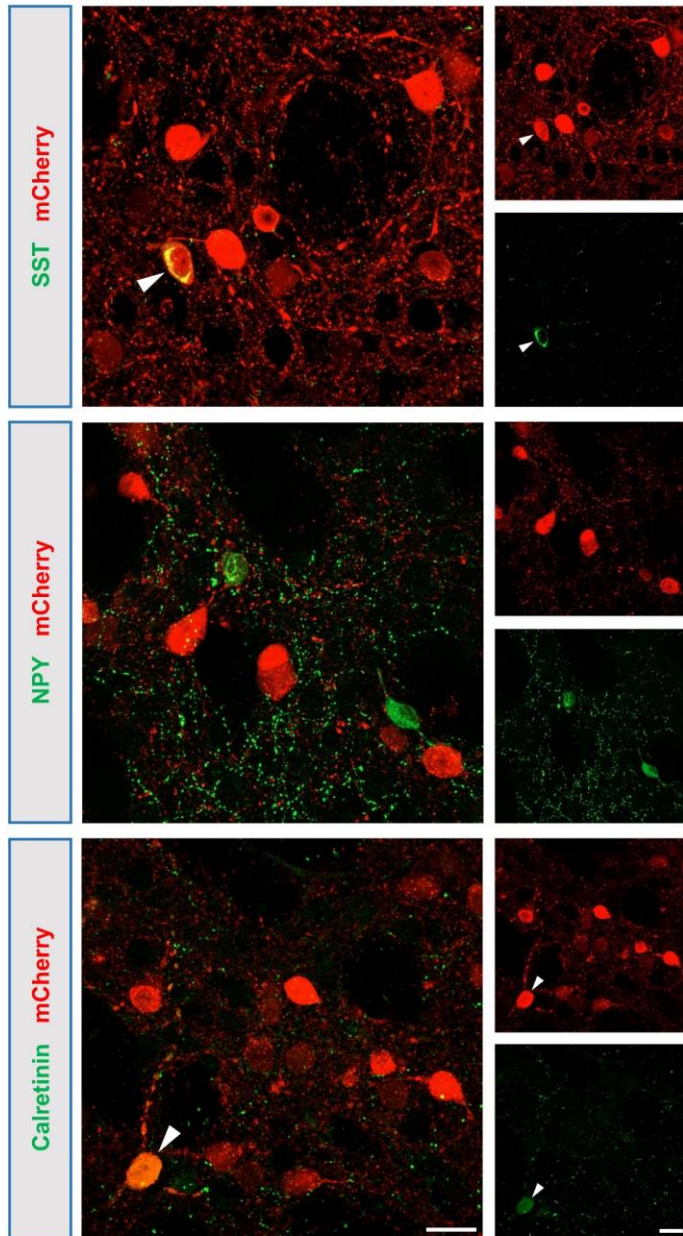

### Supplementary Figure 4. Neuronal subtype characterization among the striatal astrocyte-converted neurons in the WT mouse striatum.

The mouse brain sections were co-stained with different GABAergic subtype markers at 30 dpi. Few converted neurons were positive for somatostatin (SST, green), neuropeptide Y (NPY, green), or calretinin (green). Scale bar: 20  $\mu$ m. Quantified data were shown in **Figure 2h**.

## In vivo conversion in WT mouse brain

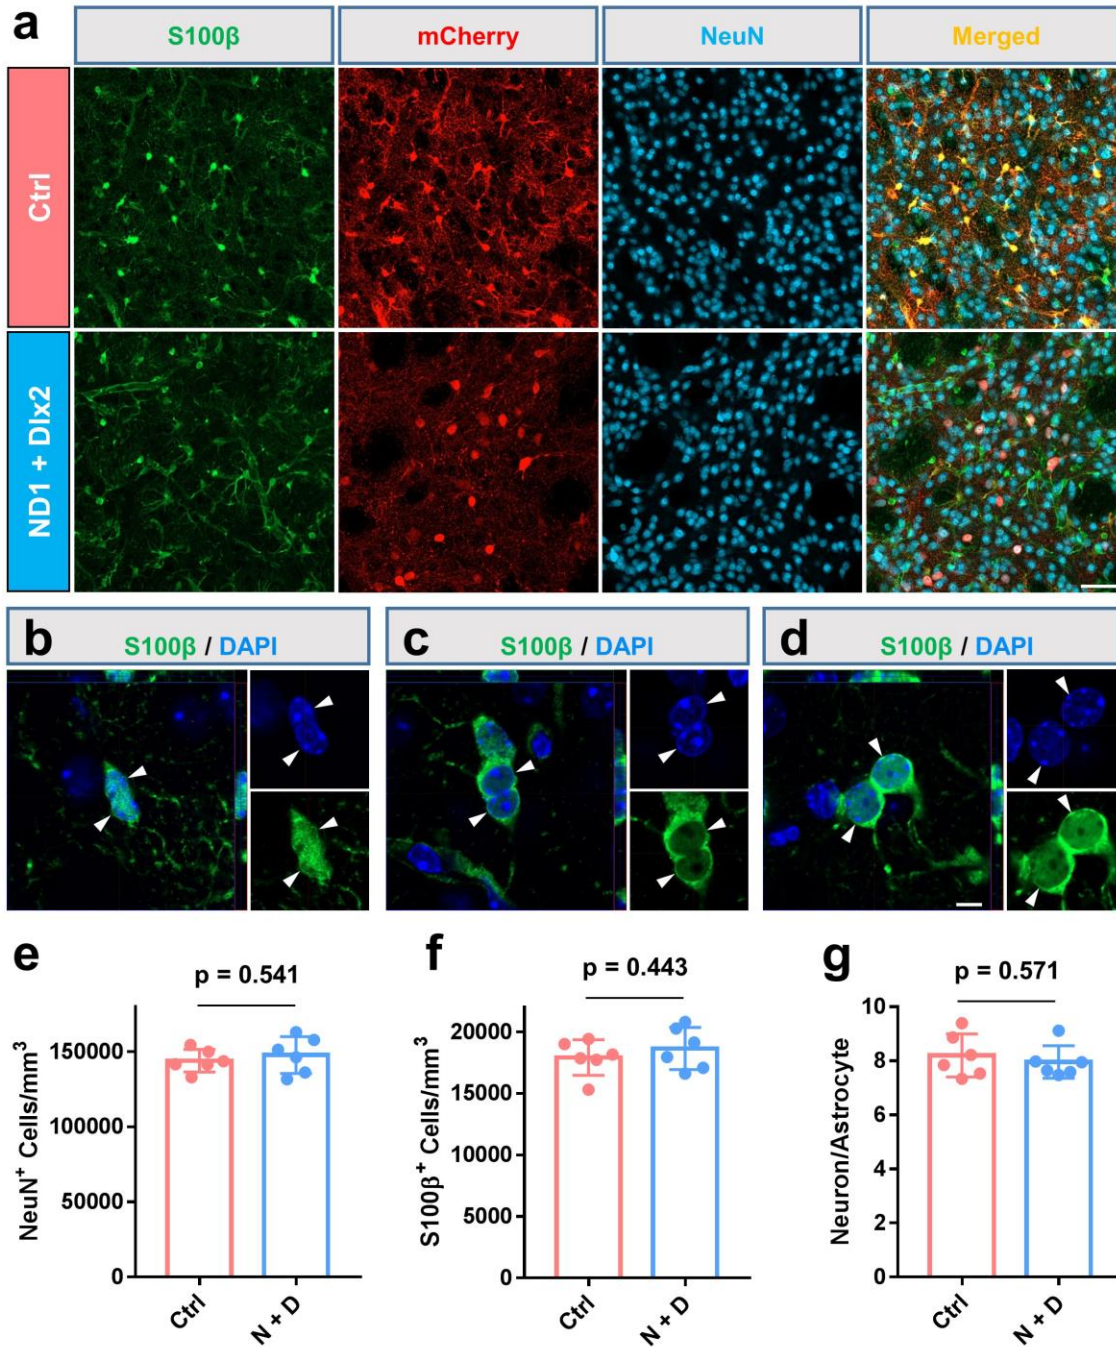

**Supplementary Figure 5. Striatal neuron and astrocyte density in WT mouse brain after conversion.**

(a) Confocal images showing the astrocytic marker S100β (green) and neuronal marker NeuN (cyan) at 30 days post AAV injection. Scale bar: 20 μm. (b-d) High magnification confocal

images showing dividing astrocytes at different stages found in NeuroD1 + Dlx2 treated mouse brains, indicating astrocytic proliferation after conversion. **(e-g)** Summary graphs showing neuronal density **(e)**, astrocytic density **(f)**, and the ratio of neuron/astrocyte **(g)** in control condition (red bar) or after cell conversion (blue bar), with no significant difference. Data are shown as mean  $\pm$  SD.

## In vivo conversion in WT mouse brain

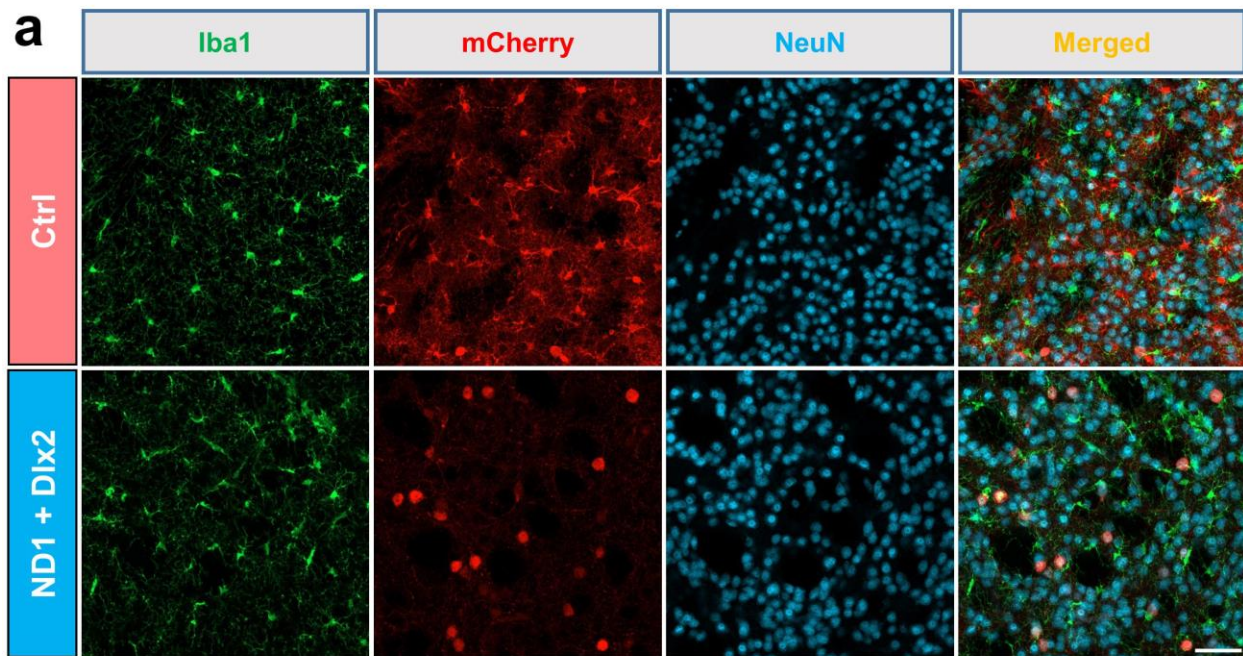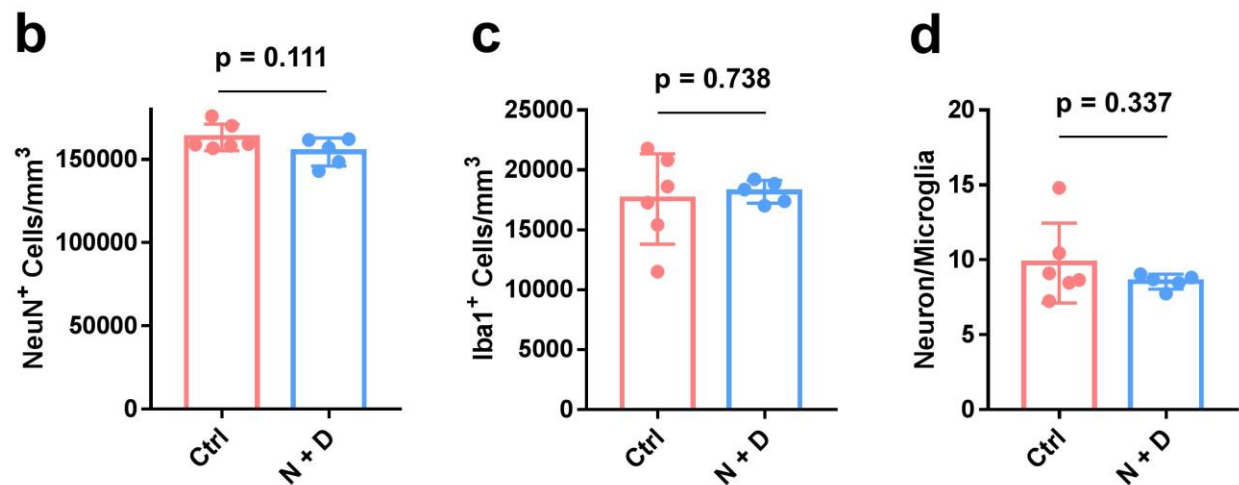

**Supplementary Figure 6. Striatal neuron and microglia density in WT mouse brain after cell conversion.**

(a) Confocal images showing the microglial marker Iba1 (green) and neuronal marker NeuN (cyan) at 30 days post AAV injection. Scale bar: 20  $\mu$ m. (b-d) Summary graphs showing neuronal density (b), microglial density (c) and the ratio of neuron/microglia (d) not changed after cell conversion. Data are shown as mean  $\pm$  SD.



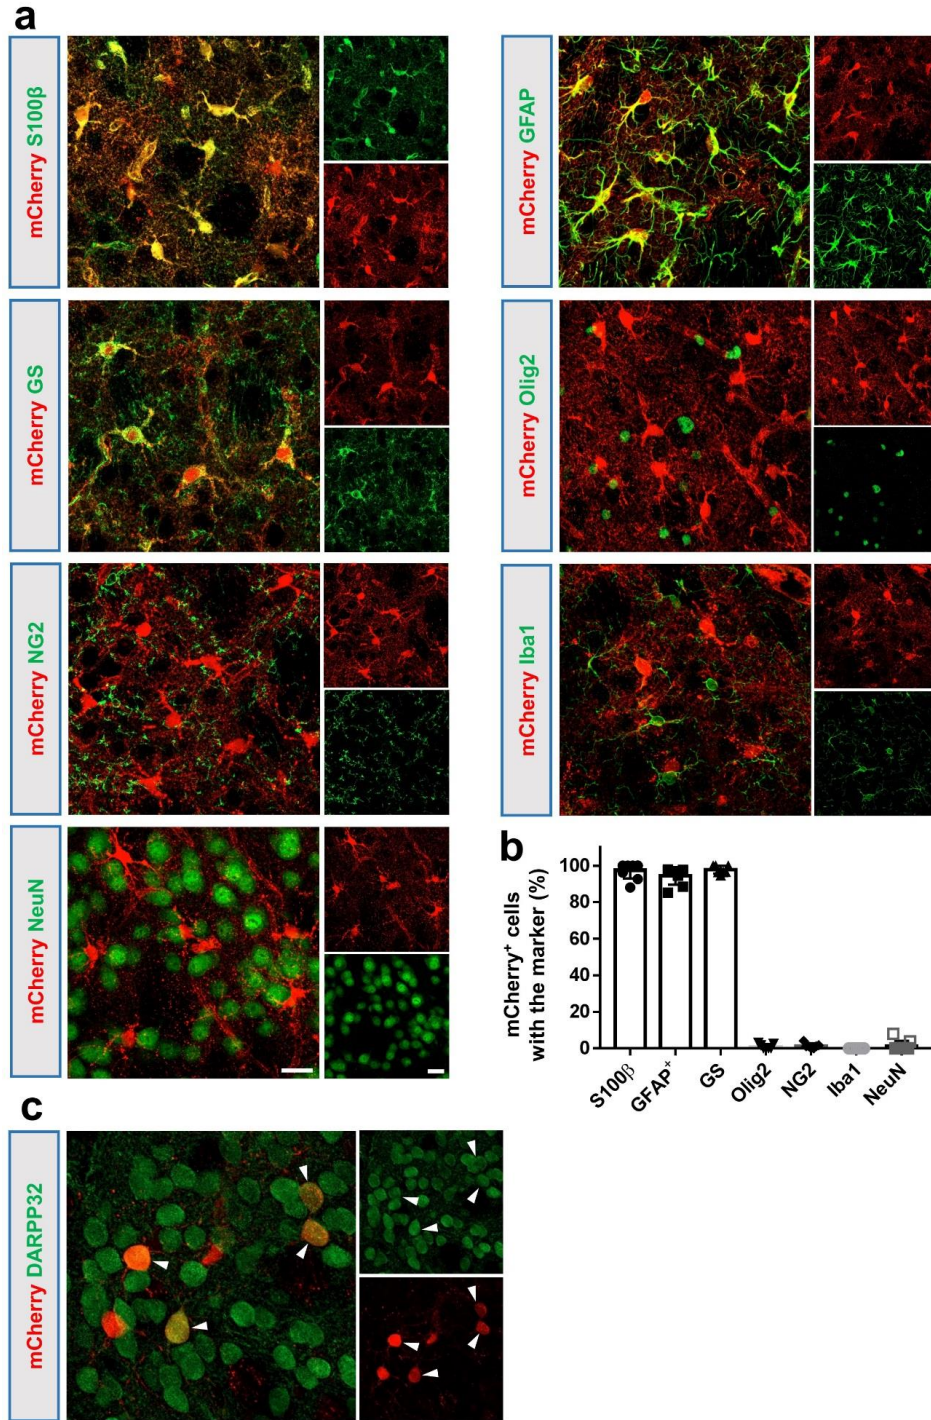

**Supplementary Figure 7. Targeting striatal astrocytes for neuronal conversion in the GFAP::Cre77.6 transgenic mouse line.**

(a) Confocal images showing the control AAV mCherry-infected cells in the striatum co-staining with different glial markers and neuronal marker at 58 dpi. Most of the mCherry<sup>+</sup> cells were co-localized with astrocytic markers including S100β, GFAP, and glutamine synthetase (GS). Very

few mCherry<sup>+</sup> cells co-stained with Olig2, NG2, Iba1, or NeuN. Scale bar: 20  $\mu$ m. **(b)** Quantified data of **(a)** showing the percentage of the mCherry<sup>+</sup> cells that co-stained with different markers. Over 95% of mCherry<sup>+</sup> cells were positive for astrocyte markers in the striatum of GFAP::Cre 77.6 mouse line. **(c)** In NeuroD1 + Dlx2-treated striatum of the GFAP::Cre 77.6 mouse line, the majority of the astrocyte-converted neurons were immunopositive for DARPP32 (58 dpi). Scale bar: 20  $\mu$ m. Data are shown as mean  $\pm$  SEM.

### Converted neurons in R6/2 mouse brain

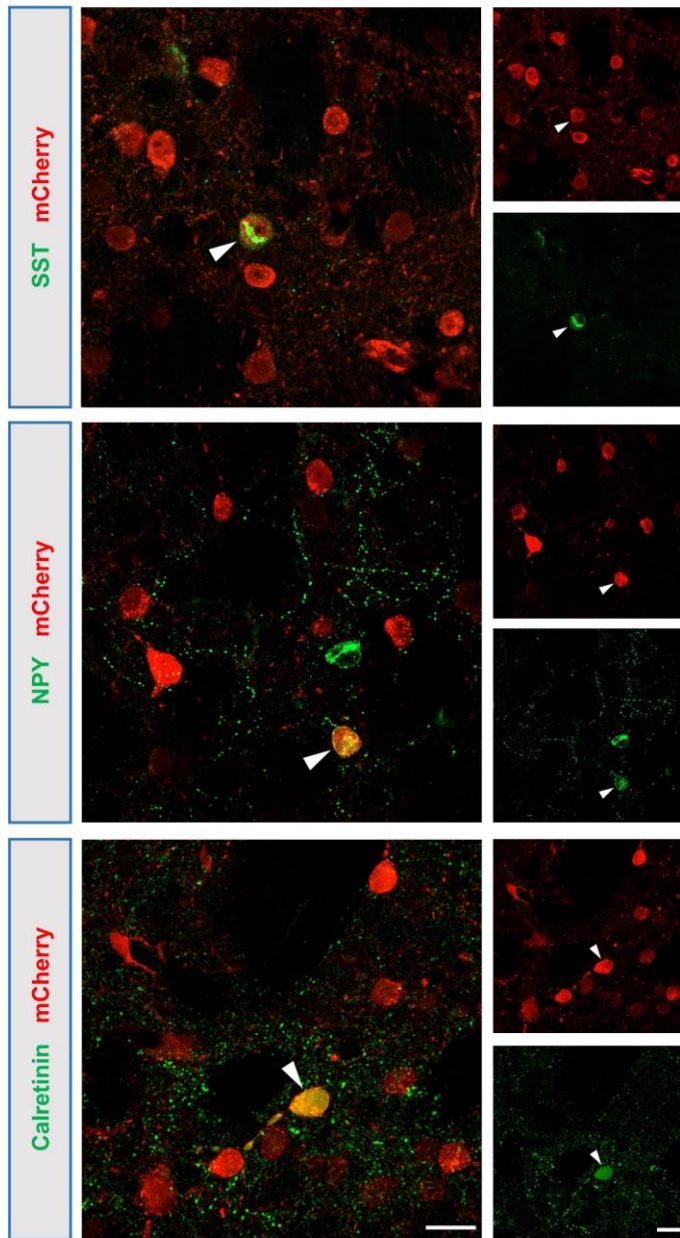

### Supplementary Figure 8. Subtype characterization of converted neurons in the R6/2 mouse striatum.

Among the striatal astrocyte-converted neurons following NeuroD1 + Dlx2 treatment in the R6/2 mouse striatum, only a few of the converted neurons were immunopositive for somatostatin (SST), neuropeptide Y (NPY), or calretinin. Scale bar: 20  $\mu$ m. Quantification was shown in **Figure 4f**.

## In vivo conversion in R6/2 mouse brain

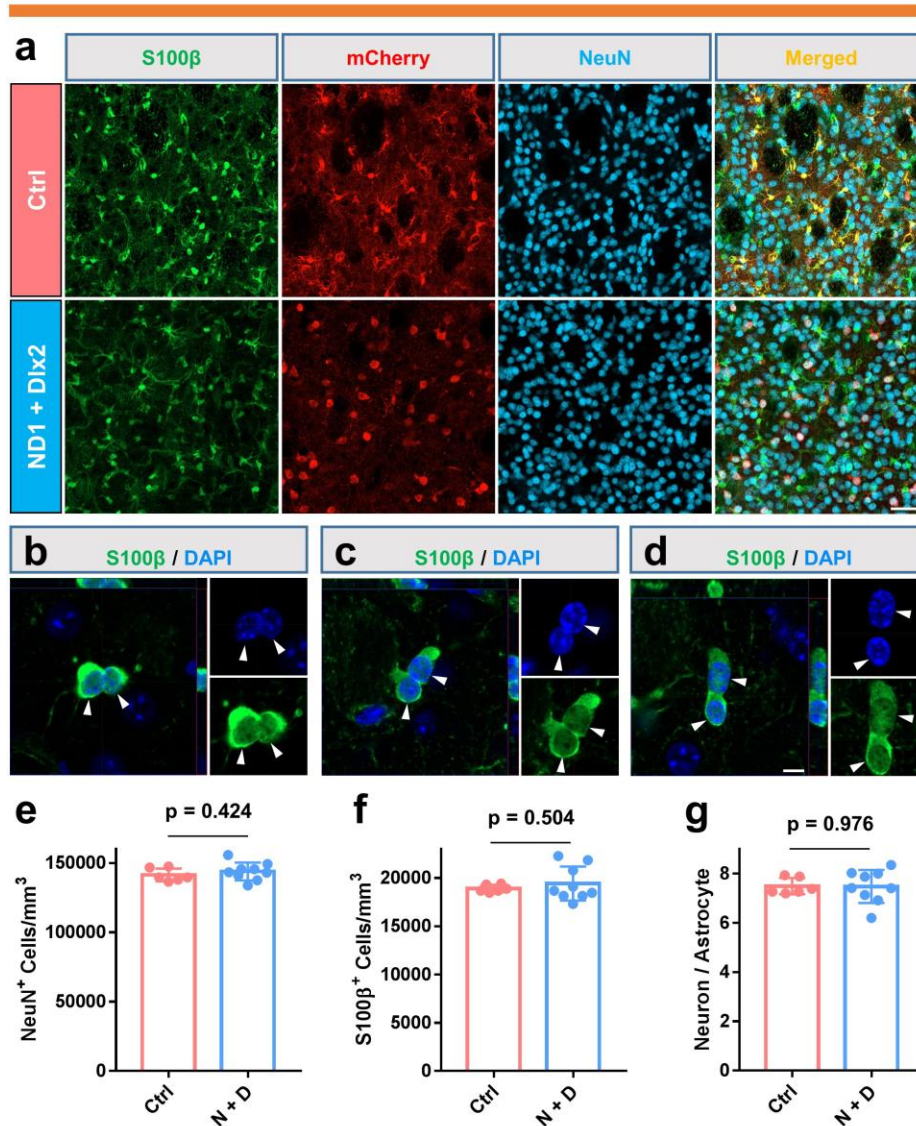

### Supplementary Figure 9. Striatal neuron and astrocyte density in R6/2 mouse brains after cell conversion.

(a) Typical confocal images of astrocytes (green), AAV-infected cells (red) and neurons (cyan) in R6/2 mouse striatum at 30 days after viral injection. Scale bar: 20  $\mu$ m. (b-d) High magnification confocal images showing different stages of dividing astrocytes in R6/2 mouse striatum after NeuroD1 + Dlx2 treatment, indicating astrocytic proliferation after conversion. (e-g) Summary graphs illustrating neuronal density (e), astrocytic density (f), and the ratio of neuron/astrocyte (g) in the R6/2 mouse striatum without (red bar) or with cell conversion (blue bar). Data are shown as mean  $\pm$  SD.

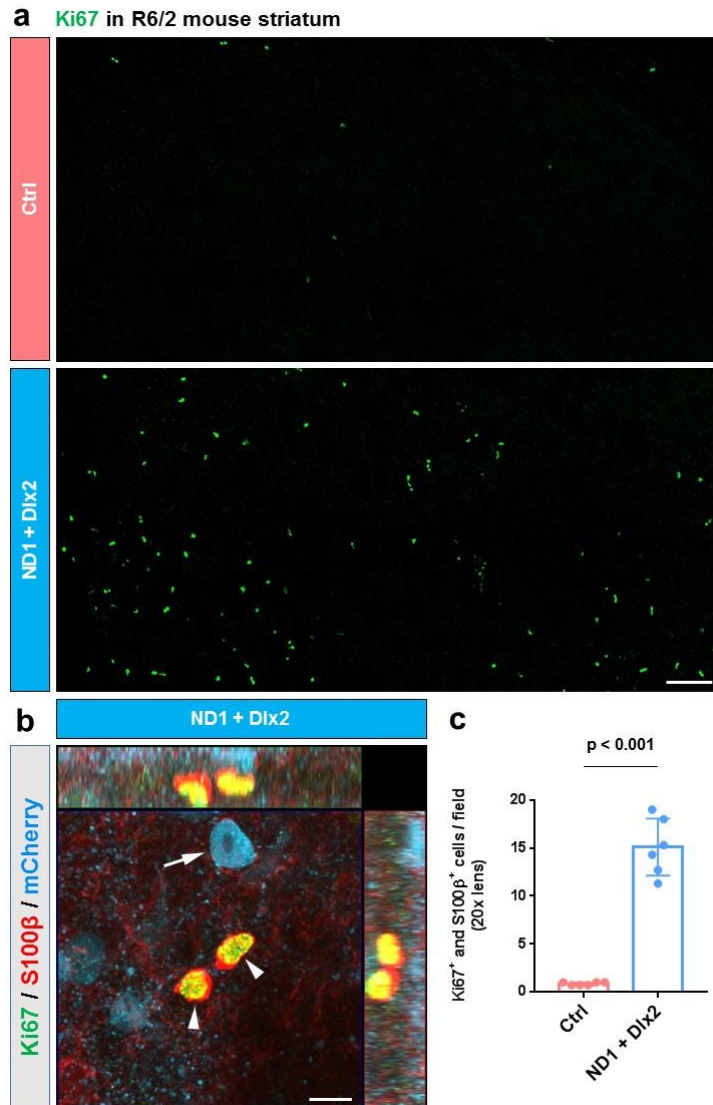

**Supplementary Figure 10. Cell conversion triggers proliferation of striatal astrocytes in R6/2 mouse brains.**

(a) Tiled low magnification confocal images of Ki67 immunostaining (green) showing many proliferating cells detected in the NeuroD1 + Dlx2-treated R6/2 mouse striatum, but very few in the striatum of control AAV-treated R6/2 mice. Scale bar: 100  $\mu$ m. (b) High magnification confocal images showing proliferating astrocytes (arrowheads) in R6/2 mouse striatum after NeuroD1 + Dlx2 treatment. The arrow indicates a converted neuron (cyan, pseudo-color). Scale bar: 10  $\mu$ m. (c) Summary graph showing the number of proliferating astrocytes dramatically increased in NeuroD1 + Dlx2-treated R6/2 striatum (30 dpi), suggesting that in vivo astrocyte-to-neuron conversion can significantly stimulate the proliferation of astrocytes to replenish themselves after astrocyte conversion. Data are shown as mean  $\pm$  SD.

## In vivo conversion in R6/2 mouse brain

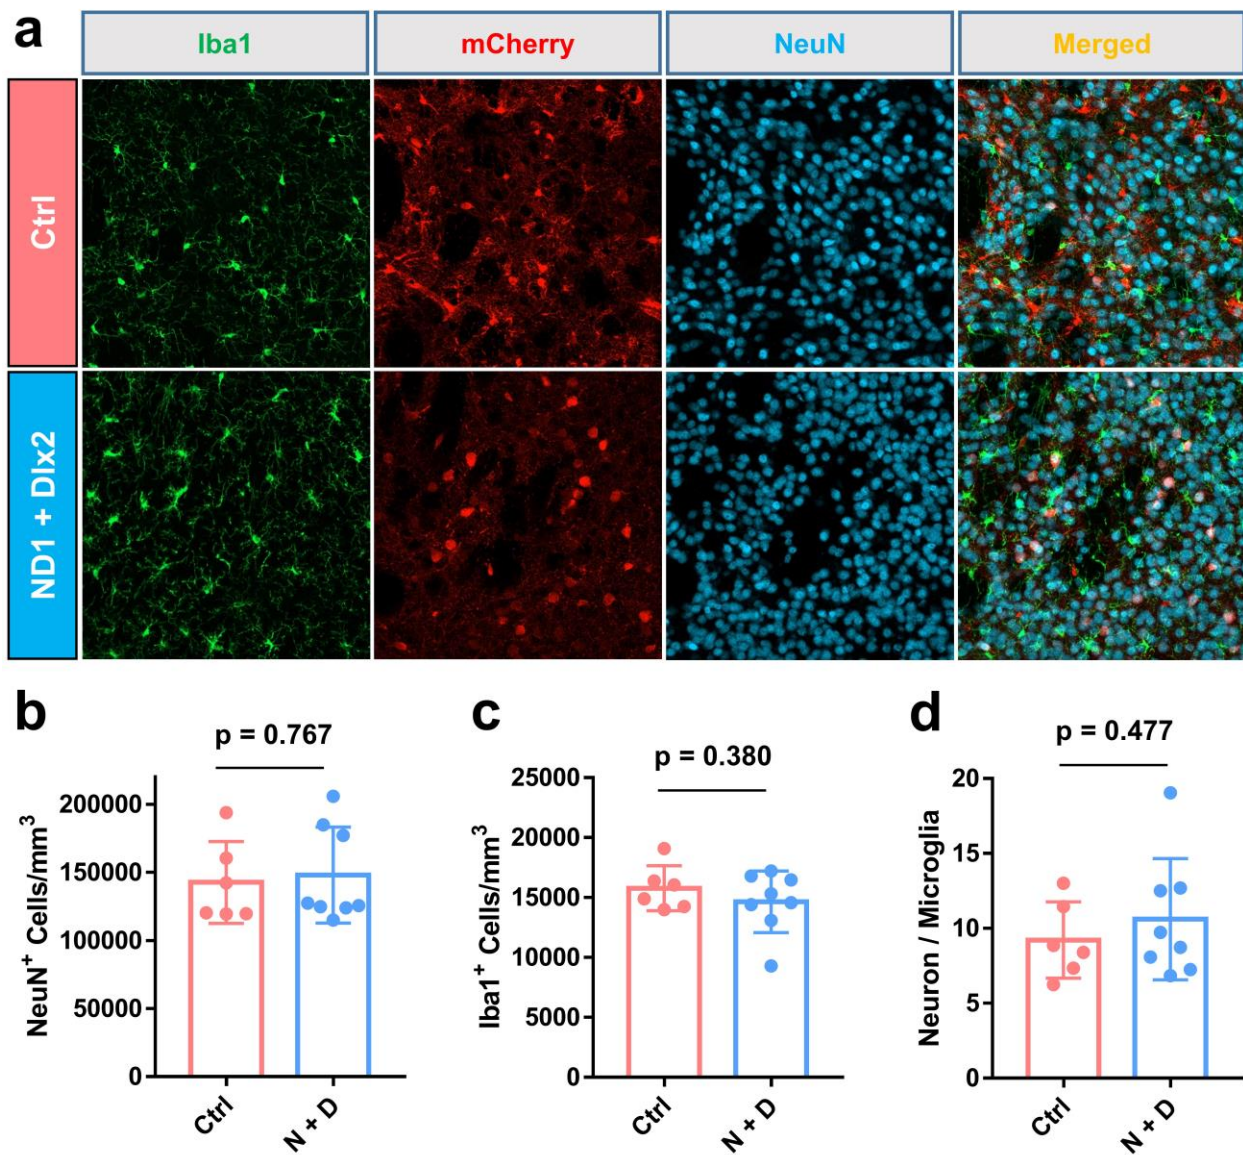

**Supplementary Figure 11. Striatal neuron and microglia density in R6/2 mouse brains after cell conversion.**

(a) Confocal images showing the microglial marker Iba1 (green) and neuronal marker NeuN (cyan) at 30 days post AAV injection. Scale bar: 20  $\mu$ m. (b-d) Summary graphs showing neuronal density (b), microglial density (c), and the ratio of neuron/microglia (d) in control (red bar) and NeuroD1+Dlx2 group (blue bar). Data are shown as mean  $\pm$  SD.

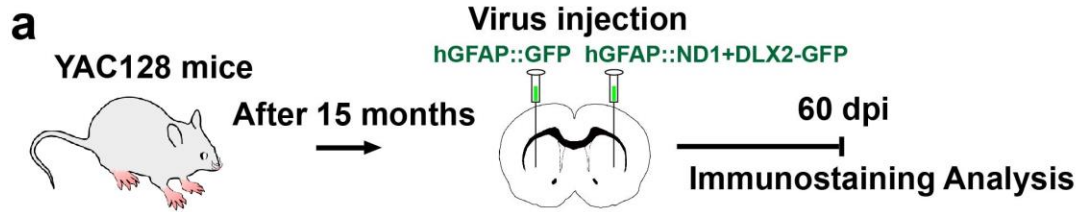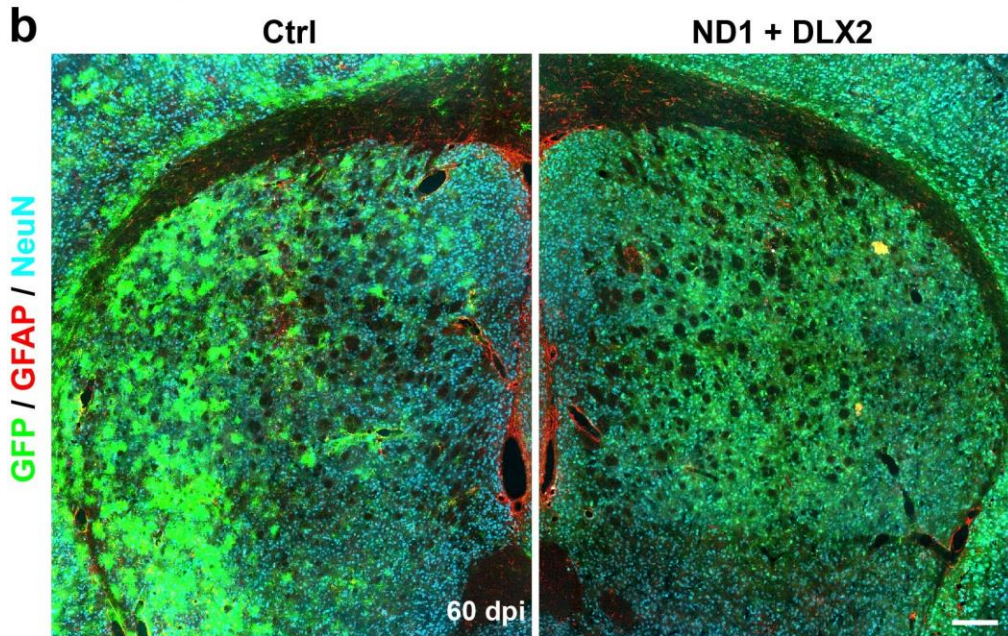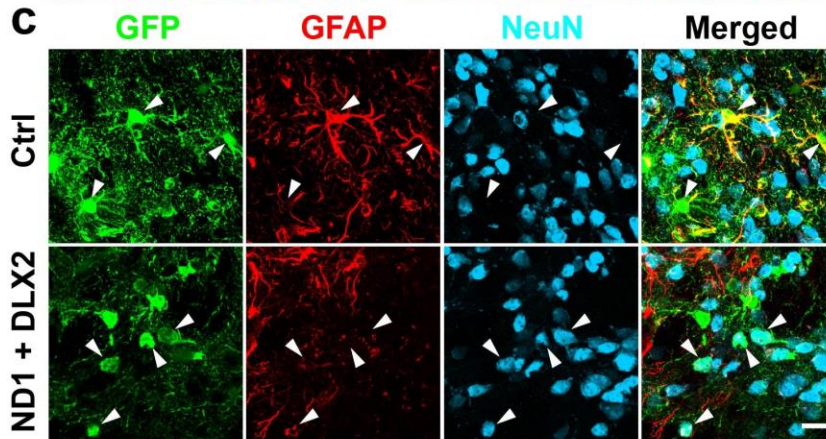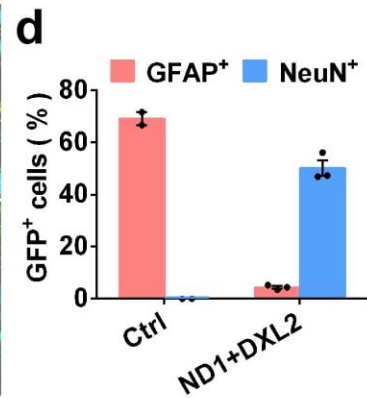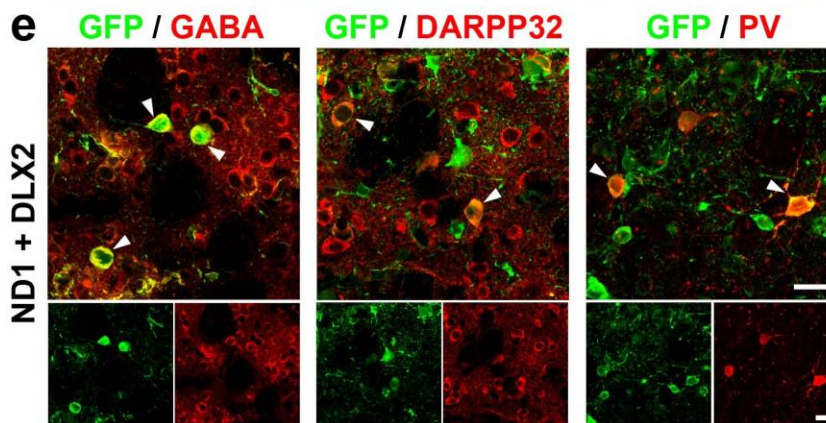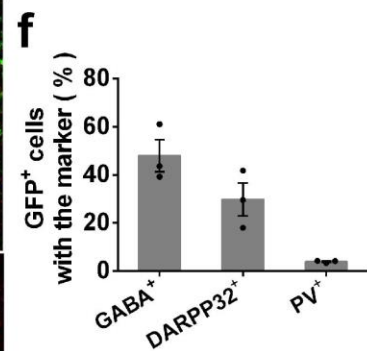

**Supplementary Figure 12. In vivo conversion of striatal astrocytes into GABAergic neurons in the YAC128 mouse brains.**

(a) Experimental design of testing cell conversion in 15-month old YAC128 transgenic mice. Expression of NeuroD1 and Dlx2 were directly driven by the hGFAP promoter. (b) Low-magnification coronal section view of the YAC128 mouse striatum injected with control GFP AAV (left panel) or NeuroD1 + Dlx2 AAV (right panel) at 60 dpi. Scale bar: 0.5 mm. (c) High-magnification images of GFP<sup>+</sup> infected cells co-stained with GFAP (red) and NeuN (cyan). Arrowheads indicate GFP<sup>+</sup> cells co-labeled with GFAP in the control group (top row), and co-labeled with NeuN in the NeuroD1 + Dlx2 treated group (bottom row). Scale bar: 20  $\mu$ m. (d) Summary data showing that by 60 dpi, the majority of GFP<sup>+</sup> cells in the control group were remaining GFAP<sup>+</sup> astrocytes; but in the NeuroD1 + Dlx2 group, half of the GFP<sup>+</sup> cells were converted into NeuN<sup>+</sup> neurons. Data are shown as mean  $\pm$  SEM. (e) Confocal images showing converted neurons in the YAC128 mouse striatum co-labeled with GABA (left), DARPP32 (middle), and parvalbumin (right). (f) Summary graph showing the percentage of converted neurons in the YAC128 mouse striatum shown in panel (e).



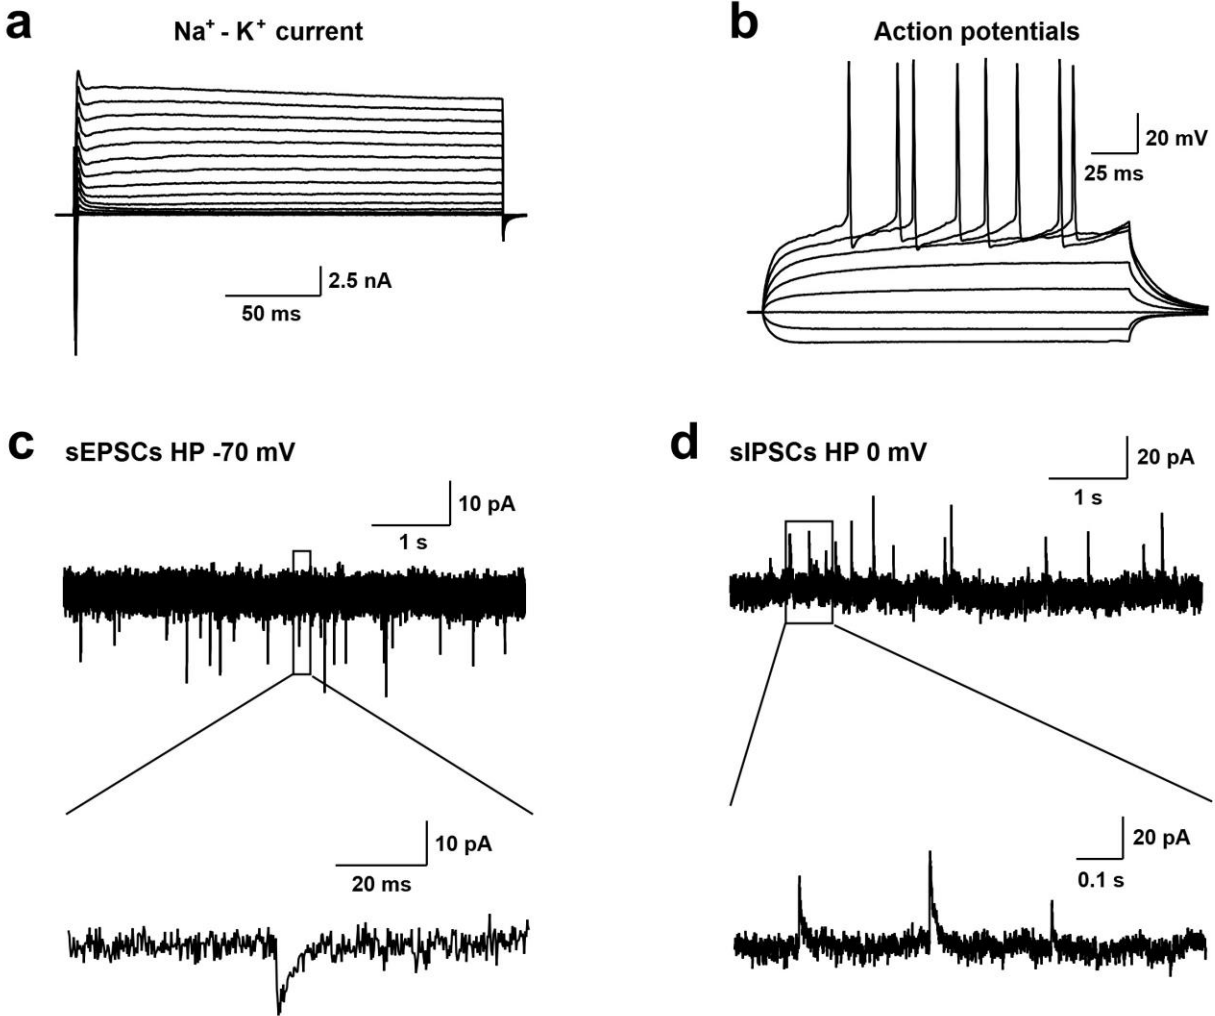

**Supplementary Figure 13. Typical electrophysiological traces recorded from striatal neurons in the wild type mice.**

(a) Representative traces showing  $\text{Na}^+ - \text{K}^+$  currents recorded from striatal neurons in the wild type mouse. (b) Typical traces of action potentials recorded from WT striatal neurons. (c-d) Typical traces of spontaneous EPSCs (c) and spontaneous IPSCs (d) recorded from WT striatal neurons.

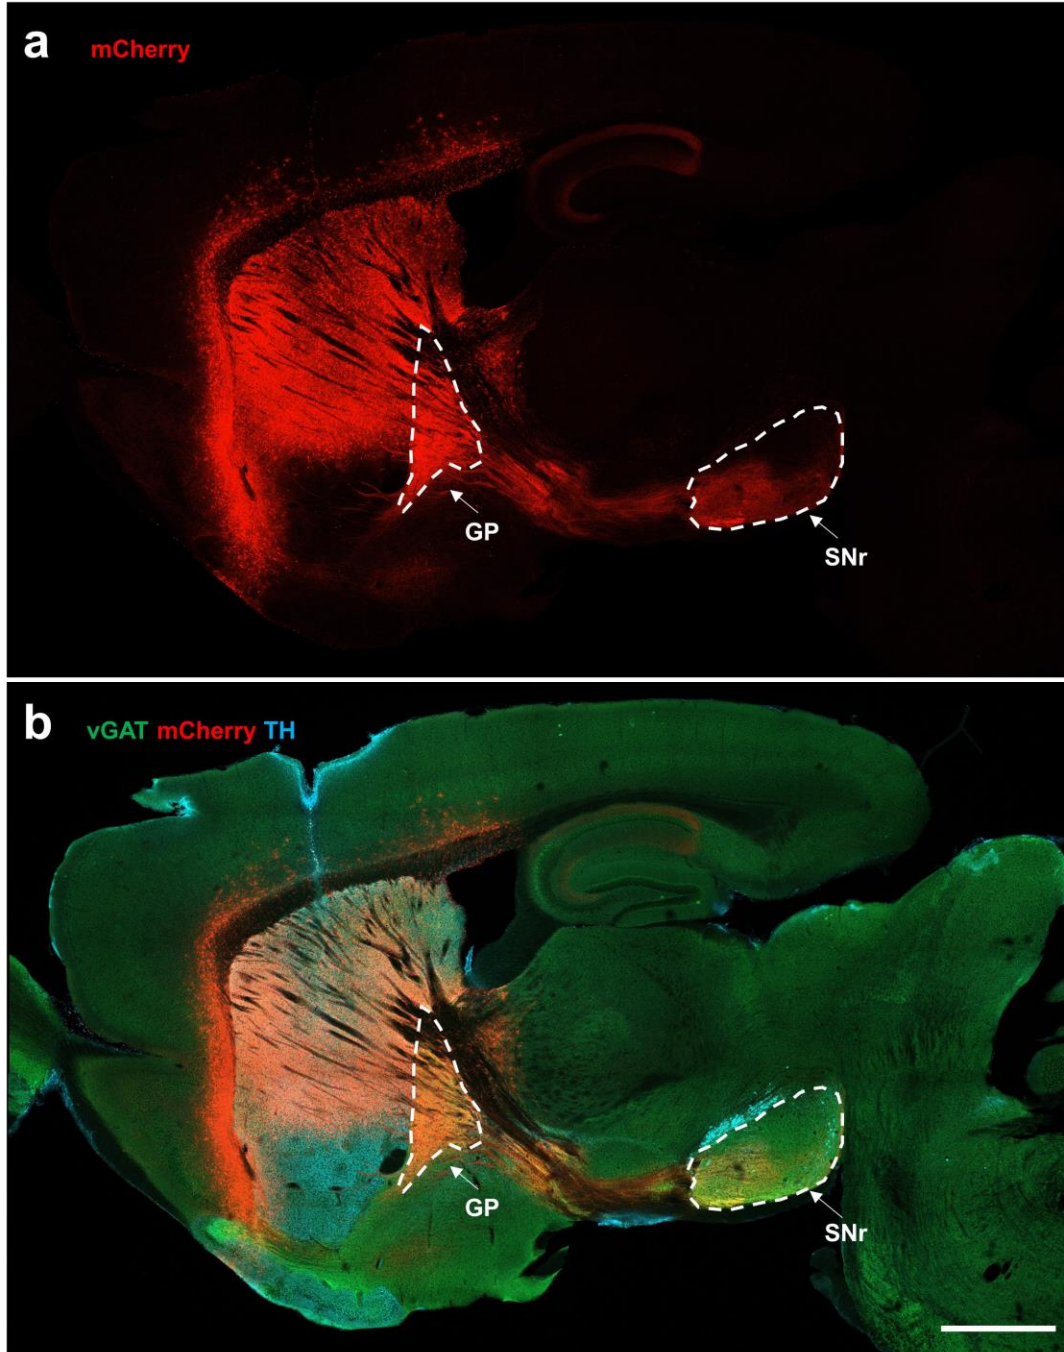

**Supplementary Figure 14. Sagittal view of R6/2 mouse brain showing axonal projection from newly converted neurons post NeuroD1 + Dlx2 treatment.**

(a) Tiled image showing sagittal view of R6/2 mouse brain at 38 days post viral injection of NeuroD1+Dlx2. mCherry<sup>+</sup> converted neurons sent axonal projections to GP and SNr areas. (b) Merged images showing the mCherry signal relative to other brain regions. Scale bar: 1 mm.

**This is enlarged view of Figure 6a.**

**a** AAV 2/5 GFAP::Cre + CAG::FLEX-mCherry-P2A-mCherry 38 dpi

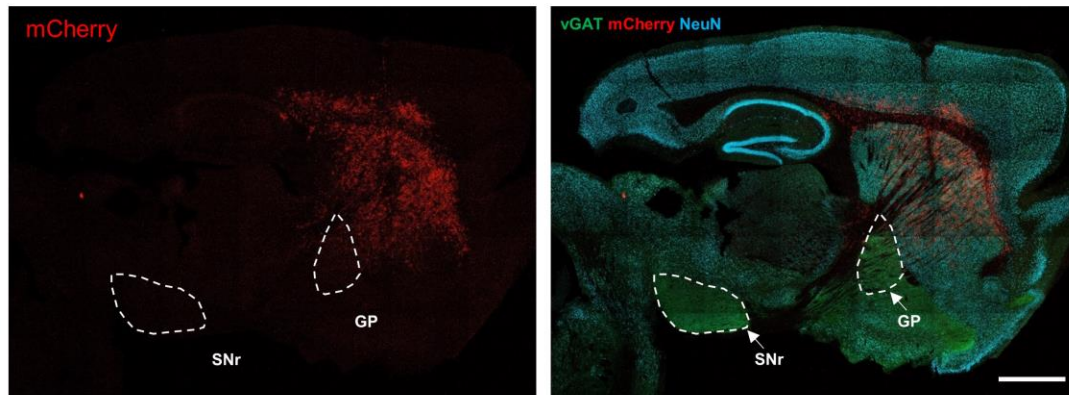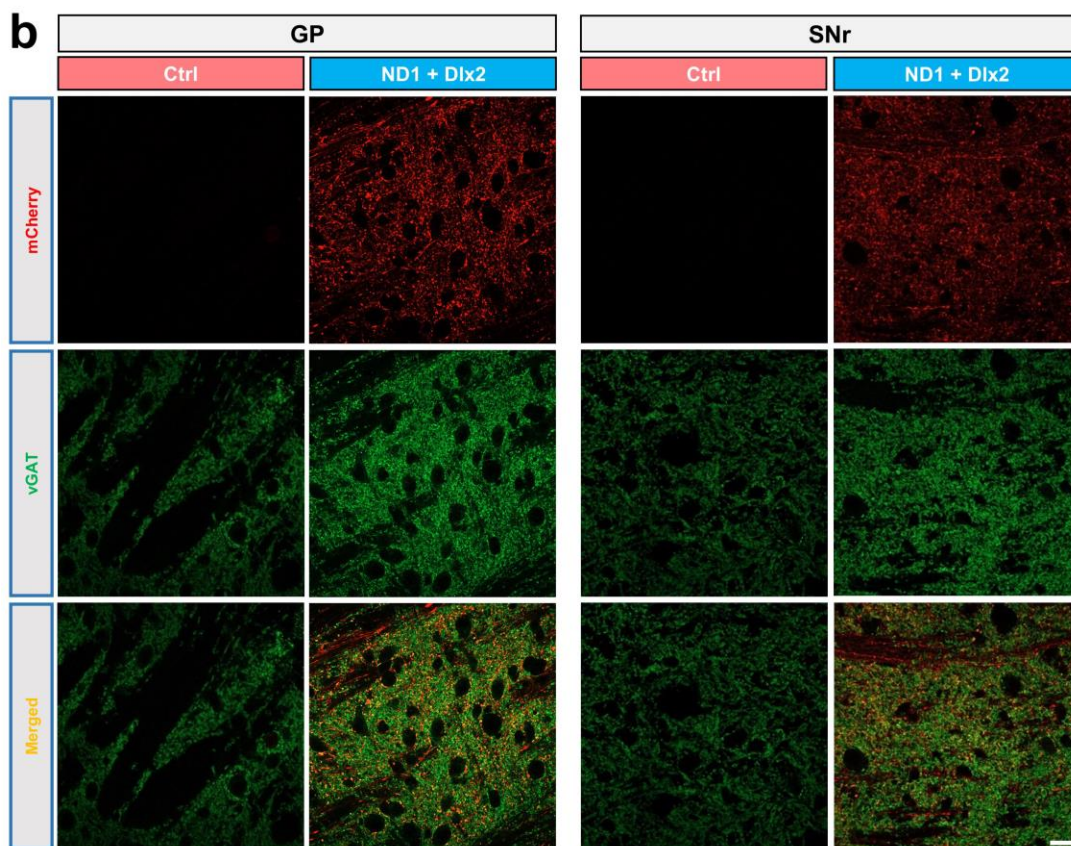

**Supplementary Figure 15. Axonal projections of the striatal astrocyte-converted neurons in the R6/2 mouse brain.**

(a) Tiled image showing sagittal view of an R6/2 mouse brain injected with control AAV mCherry (38 dpi). No mCherry<sup>+</sup> signal detected in the GP or SNr. Scale bar: 1 mm. (b) High-magnification images showing a significant axonal projection from converted neurons (mCherry<sup>+</sup> signal in ND1+Dlx2) to the target areas of GP and SNr following NeuroD1 plus Dlx2 treatment (38 dpi), but no mCherry<sup>+</sup> signal detected in the GP and SNr after control virus treatment (38

dpi). Scale bar: 10  $\mu\text{m}$ . The high-resolution images of the mCherry and vGAT puncta were shown in **Figure 6b** and quantified data were shown in **Figure 6c**.

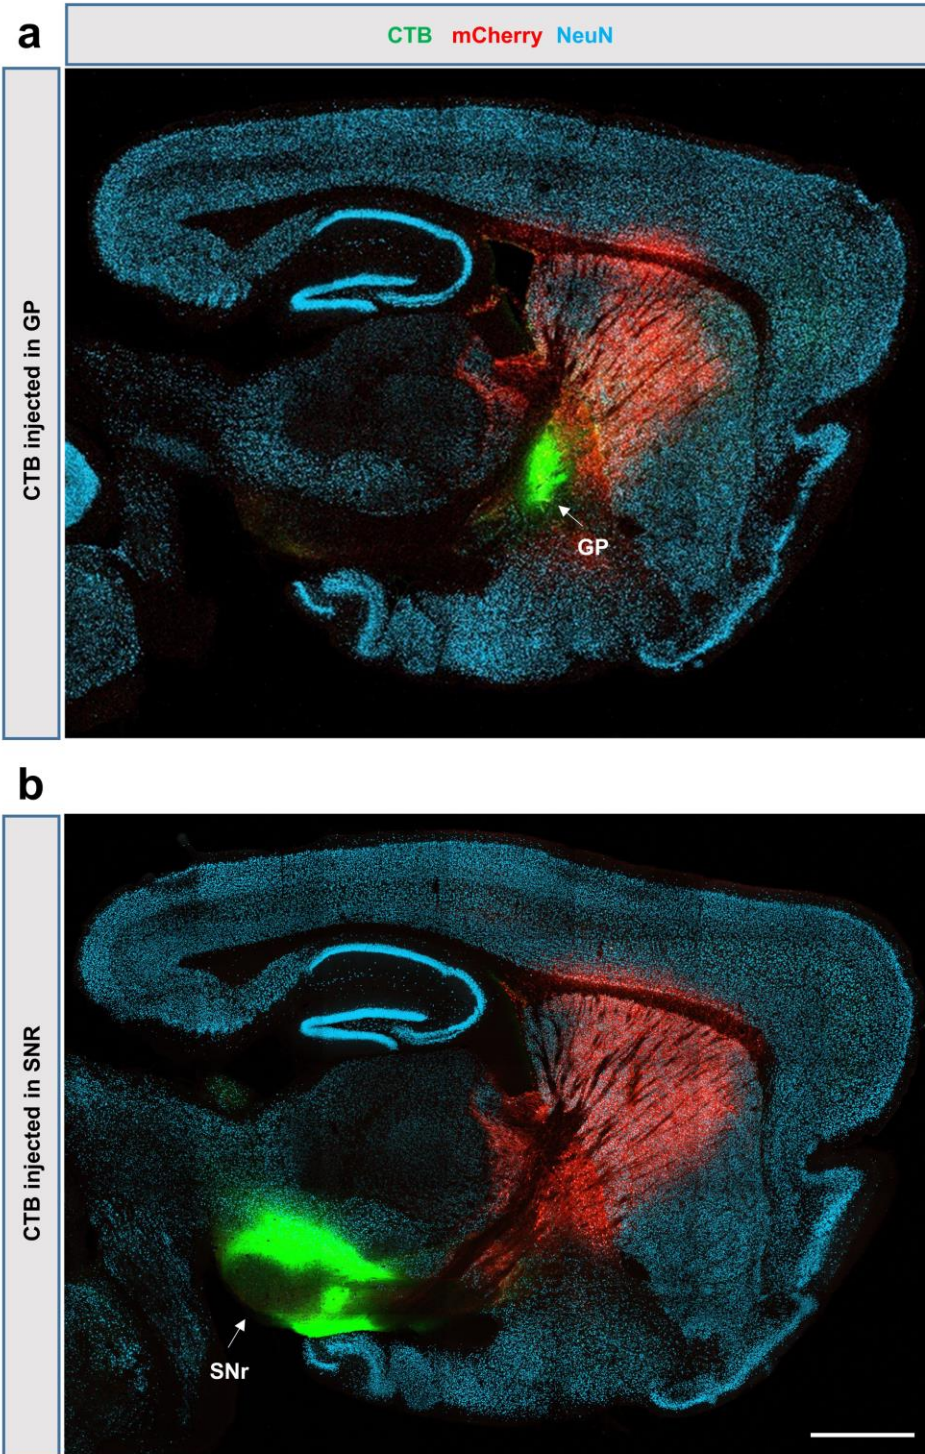

**Supplementary Figure 16. Validating the sites of CTB injection.**

(a) A sagittal view of CTB (green) injection in the GP. (b) A sagittal view of CTB (green) injection in the SNr. Mice were sacrificed at 7 days post CTB injection. Scale bar: 1 mm.

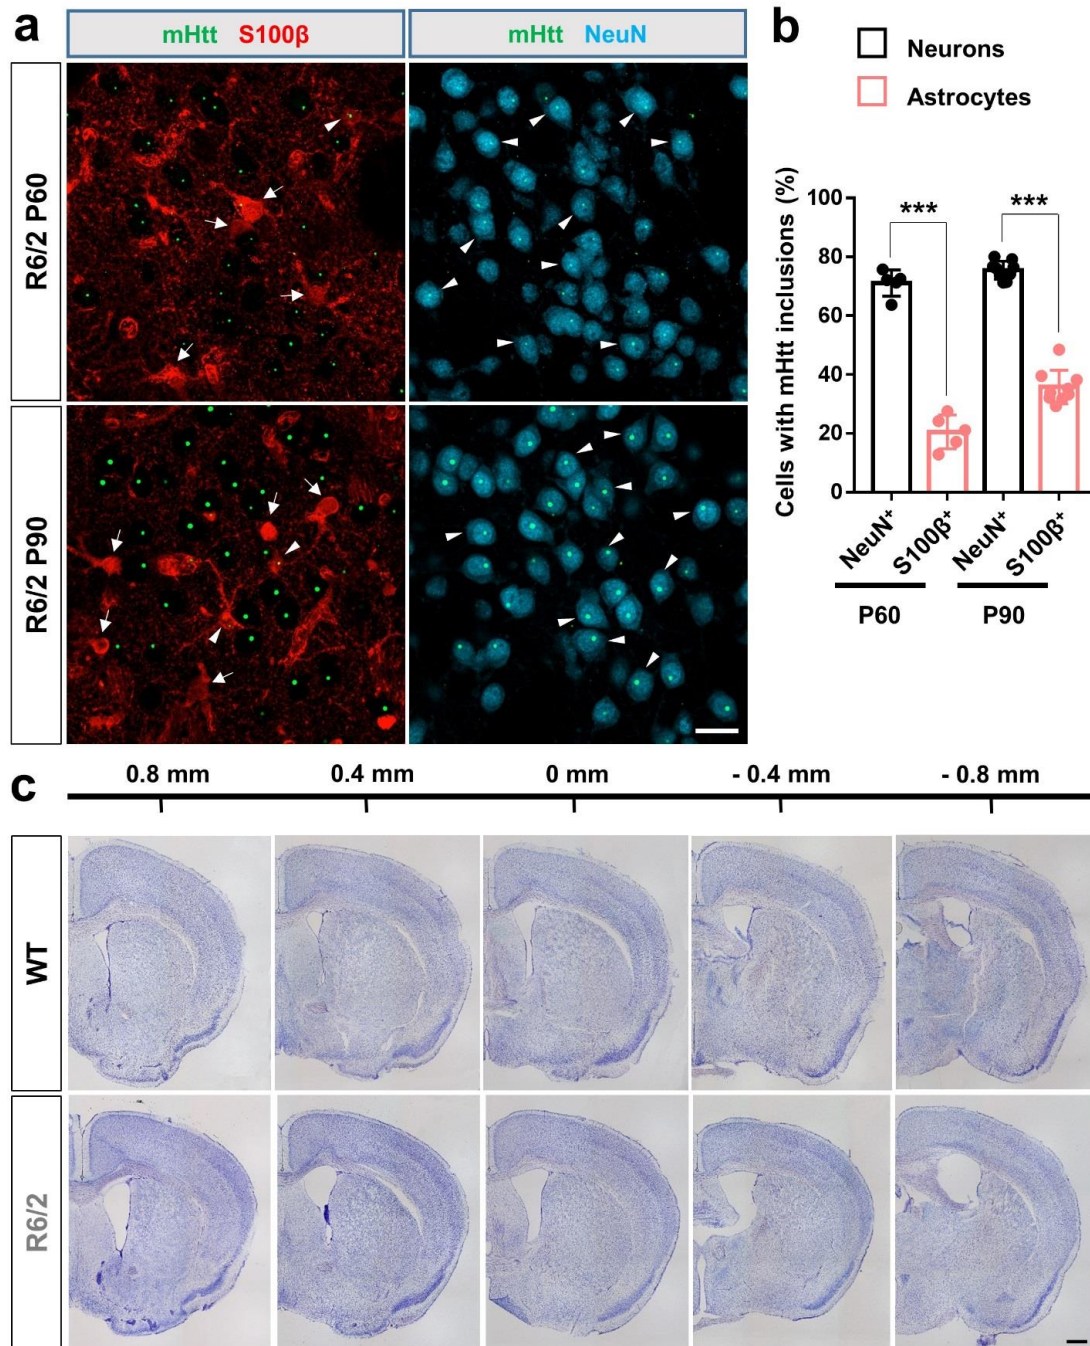

**Supplementary Figure 17. mHtt inclusions and striatum atrophy in non-surgery R6/2 mice.**

(a) In non-surgery R6/2 mice, mHtt inclusions (green) were mostly found in striatal neurons (NeuN, cyan) and less in astrocytes (S100 $\beta$ , red) (age of P60 and P90). Arrows indicate cells without mHtt inclusions and Arrowheads indicate cells with mHtt inclusions. Scale bar: 20  $\mu$ m.

(b) Quantified data of (a). (c) Nissl staining of serial coronal sections of WT littermates and R6/2

mice without surgery (age of P90). Scale bar: 0.5 mm. The quantified data were shown **in Figure 7d**.
